# Supplementary figures and images for: A plausible investigation of low dimensional magnetism in a 3D spin system PrVO4
Source: Royal Society of Chemistry journal article supplement (doi:10.1039/d2cp04449h), 2023-01-01

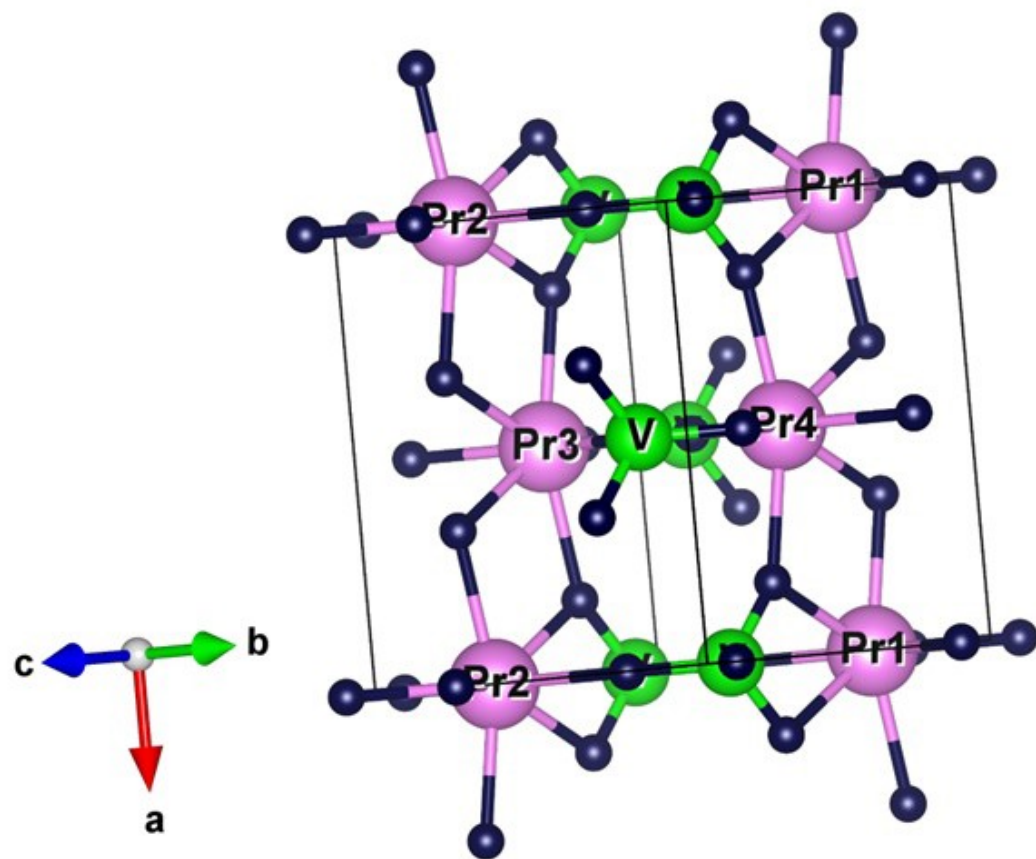

Supplement: d2cp04449h1.pdf [file d2cp04449h1.pdf]
